# Supplementary material
Source: PubMed Central journal article supplement (PMC2481328)
Supplement: 0708518105_0708518105SI.pdf [file 0708518105_0708518105SI.pdf]

# Supporting Information

van der Brug *et al.* 10.1073/pnas.0708518105

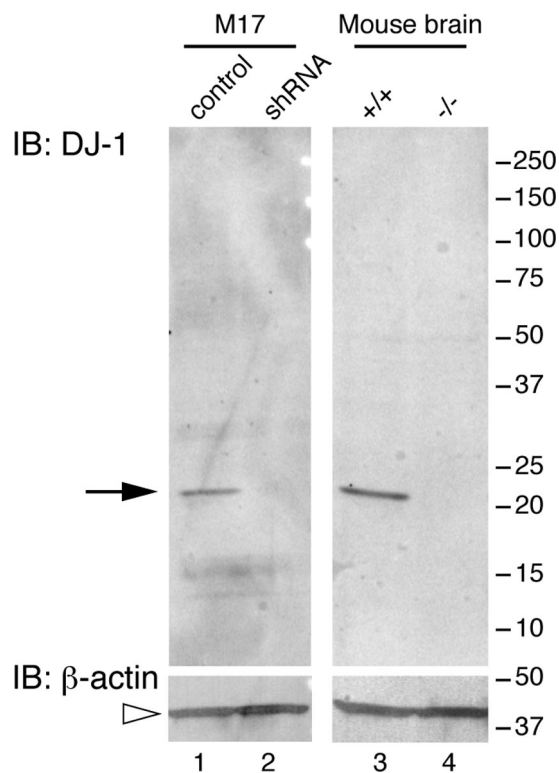

**Fig. S1.** Quality control for DJ-1 antibody. The antibody to DJ-1 used for immunoprecipitation was validated by Western blotting in both human cell lines (M17 neuroblastoma; lanes 1 and 2) and mouse brain (lanes 3 and 4). Negative controls were shRNA cell lines for the M17 cells (lane 2) and knockout mouse brain (lane 4). In both human and mouse, a single band of  $\approx 22$  kDa is seen that is greatly decreased or absent after knockdown or knockout of DJ-1, respectively. The same blots were reprobbed with a mAb to  $\beta$ -actin to confirm equal loading. Molecular mass markers on the right of the blots are in kDa.

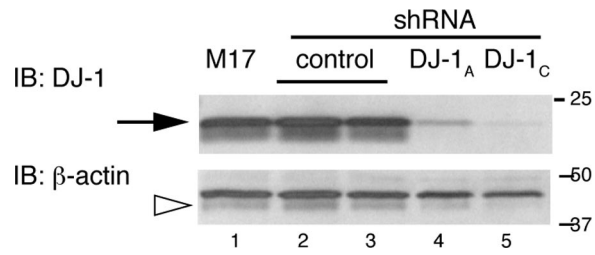

**Fig. S2.** Quality control for DJ-1 shRNA lines. We used lentiviral constructs to make stable cell lines expressing either a nonsense shRNA (lanes 2 and 3) or two distinct shRNA sequences to DJ-1 (lanes 4 and 5). The nonsense shRNA did not affect DJ-1 expression levels compared with parental cells (lane 1) but the shRNA constructs decreased expression by >85 and >95%, respectively. The blot was reprobbed with  $\beta$ -actin to confirm equal loading.





**Table S2. Selenoprotein and selenium metabolism enzyme transcripts associated with DJ-1**

| Symbol   | GenBank accession no. | Definition                                      | Fold enrichment | Diff. score |
|----------|-----------------------|-------------------------------------------------|-----------------|-------------|
| SEPW1*   | NM_003009.2           | Selenoprotein W, 1                              | 12.1            | 371         |
| GPX4*†   | NM_002085.1           | GSH peroxidase 4 (phospholipid hydroperoxidase) | 9.2             | 371         |
| SELH*    | NM_170746.1           | Selenoprotein H                                 | 5.3             | 115         |
| SEPX1*   | NM_016332.2           | Selenoprotein X, 1                              | 3.6             | 231         |
| SEPHS2*† | NM_012248.2           | Selenophosphate synthetase 2                    | 2.6             | 213         |
| SELT*    | NM_016275.3           | Selenoprotein T                                 | 2.4             | 203         |
| GPX3*    | NM_002084.2           | GSH peroxidase 3                                | 2.2             | 79.5        |

\*Confirmed by RT-PCR in M17 cells.

†Confirmed in mouse brain

**Table S3. Nuclear and mitochondrial encoded mitochondrial transcripts associated with DJ-1**

| Symbol  | GenBank accession no. | Definition                                                    | Fold Enrichment | Diff. score |
|---------|-----------------------|---------------------------------------------------------------|-----------------|-------------|
| MTND4*  | NM_173711.1           | NADH dehydrogenase 4                                          | 120             | 356         |
| MTND2*  | NM_173709.1           | NADH dehydrogenase 2                                          | 83              | 82.8        |
| MTATP6  | NM_173702.1           | ATP synthase 6                                                | 54              | 371         |
| MTND5*  | NM_173713.1           | NADH dehydrogenase 5                                          | 46              | 50.0        |
| MTND1*† | NM_173708.1           | NADH dehydrogenase 1                                          | 39              | 371         |
| MTCO2*  | NM_173705.1           | Cytochrome c oxidase II                                       | 7.5             | 109         |
| MTCO1*  | NM_173704.1           | Cytochrome c oxidase I                                        | 4.0             | 359         |
| NDUFB1  | NM_004545.3           | NADH dehydrogenase (ubiquinone) 1 beta subcomplex,<br>1.7 kDa | 3.9             | 329         |

\* Confirmed by RT-PCR.

†Confirmed in mouse brain.

**Table S4. PTEN/Akt pathway transcripts associated with DJ-1**

| Symbol                 | GenBank accession no. | Definition                                                               | Fold enrichment | Diff. score |
|------------------------|-----------------------|--------------------------------------------------------------------------|-----------------|-------------|
| JUND*                  | NM_005354.2           | Jun D protooncogene                                                      | 9.0             | 371         |
| RPS6KB2                | NM_003952.1           | Ribosomal protein S6 kinase, 70 kDa, polypeptide 2                       | 5.4             | 39.8        |
| PPP2R2C*               | NM_181876.1           | Protein phosphatase 2, regulatory subunit B, $\gamma$ isoform, variant 2 | 4.0             | 41.2        |
| BCL2L1 <sup>†</sup>    | NM_001191.2           | BCL2-like 1, transcript variant 2                                        | 3.8             | 309         |
| RASL10B                | NM_033315.2           | RAS-like, family 10, member B (RASL10B)                                  | 3.5             | 128         |
| MAPK8IP1* <sup>†</sup> | NM_005456.2           | MAPK 8-interacting protein 1 (MAPK8IP1)                                  | 3.4             | 103         |
| EIF4EBP1               | NM_004095.2           | Eukaryotic translation initiation factor 4E binding protein 1 (EIF4EBP1) | 3.2             | 58.7        |

\* Confirmed by RT-PCR.

<sup>†</sup>Confirmed in mouse brain.

**Table S5. Additional RNA sequences retrieved from CLIP cloning experiments.**

| Gene                                                                     | GenBank accession no. | Sequence                                                                                                                                                                                                                                                                                                                                                                                                                |
|--------------------------------------------------------------------------|-----------------------|-------------------------------------------------------------------------------------------------------------------------------------------------------------------------------------------------------------------------------------------------------------------------------------------------------------------------------------------------------------------------------------------------------------------------|
| Additional candidate interactors based on BLAST from recovered sequences |                       |                                                                                                                                                                                                                                                                                                                                                                                                                         |
| NUP98                                                                    | NM_016320.3           | taccaagatggatagccaaggagcgtttcaatcca                                                                                                                                                                                                                                                                                                                                                                                     |
| PPF1A3                                                                   | NM_003660.2           | gagccgtttcaggcacataatccataa                                                                                                                                                                                                                                                                                                                                                                                             |
| RBM5                                                                     | NM_005778.1           | ctgccttggctcctagggcagctcccttagcgaact                                                                                                                                                                                                                                                                                                                                                                                    |
| LZTR1                                                                    | NM_006767.2           | acgaactccacgtcgagaactggcgg                                                                                                                                                                                                                                                                                                                                                                                              |
| CDC14                                                                    | NM_003671.2           | gccagaagcgagagcccctcgg                                                                                                                                                                                                                                                                                                                                                                                                  |
| PPP1R16B                                                                 | NM_015568.2           | tgggcaccttccagcagctgcagctccgta                                                                                                                                                                                                                                                                                                                                                                                          |
| CDC14                                                                    | NM_003671.2           | cgaggggctctcgttctggccaagcgccc                                                                                                                                                                                                                                                                                                                                                                                           |
| SLC35E1                                                                  | NM_024881.3           | ggaggcaaaggagaagagagaagttccctccatctggatctgg                                                                                                                                                                                                                                                                                                                                                                             |
| ELAVL3                                                                   | NM_032281.2           | gacgggaaggagtggtgggctggcctt                                                                                                                                                                                                                                                                                                                                                                                             |
| EIF4B                                                                    | NM_001417.3           | accggccacatatcgatccat                                                                                                                                                                                                                                                                                                                                                                                                   |
| EXOC7                                                                    | NM_001013839.1        | tccatctagaccatgctgggaatactgttccagaaggttct                                                                                                                                                                                                                                                                                                                                                                               |
| MYCN                                                                     | NM_005378.4           | ccggggctcgggacgagcgctgg                                                                                                                                                                                                                                                                                                                                                                                                 |
| LOC728937                                                                | NM_001093731.2        | ggcatcgaagacgctcgttcagaaatgcctt                                                                                                                                                                                                                                                                                                                                                                                         |
| Short sequences that could not be identified                             |                       |                                                                                                                                                                                                                                                                                                                                                                                                                         |
|                                                                          |                       | tcgtcggactgtagaactctgaacctgtcgggtggtcgccgtatcattaatcccggcca<br>cagtcttagcaggaccctcttcgaccgacttgagtgt<br>attgggtgggacagagttccaaccatcacata<br>cgatcggctcgcgagctcagtaggataga<br>gattaatgatactgcgaccaccg<br>attggcctgaaggactg<br>gccgggacgttagcac<br>cccaagacct<br>atcaccaggtga<br>cgctccctcgtg<br>gggcaggcacatgt<br>ccggaacccaaa<br>gcacggccaggaa<br>gtagtggttcat<br>taccgctg<br>ggccttgata<br>agtgattctggga<br>ggcgatcatt |

## Other Supporting Information Files

[Table S1 \(XLS\)](#)
